# Supplementary material
Source: PubMed Central journal article supplement (PMC5198280)
Supplement: ASN.2015121324SupplementaryData.pdf [file ASN.2015121324SupplementaryData.pdf]

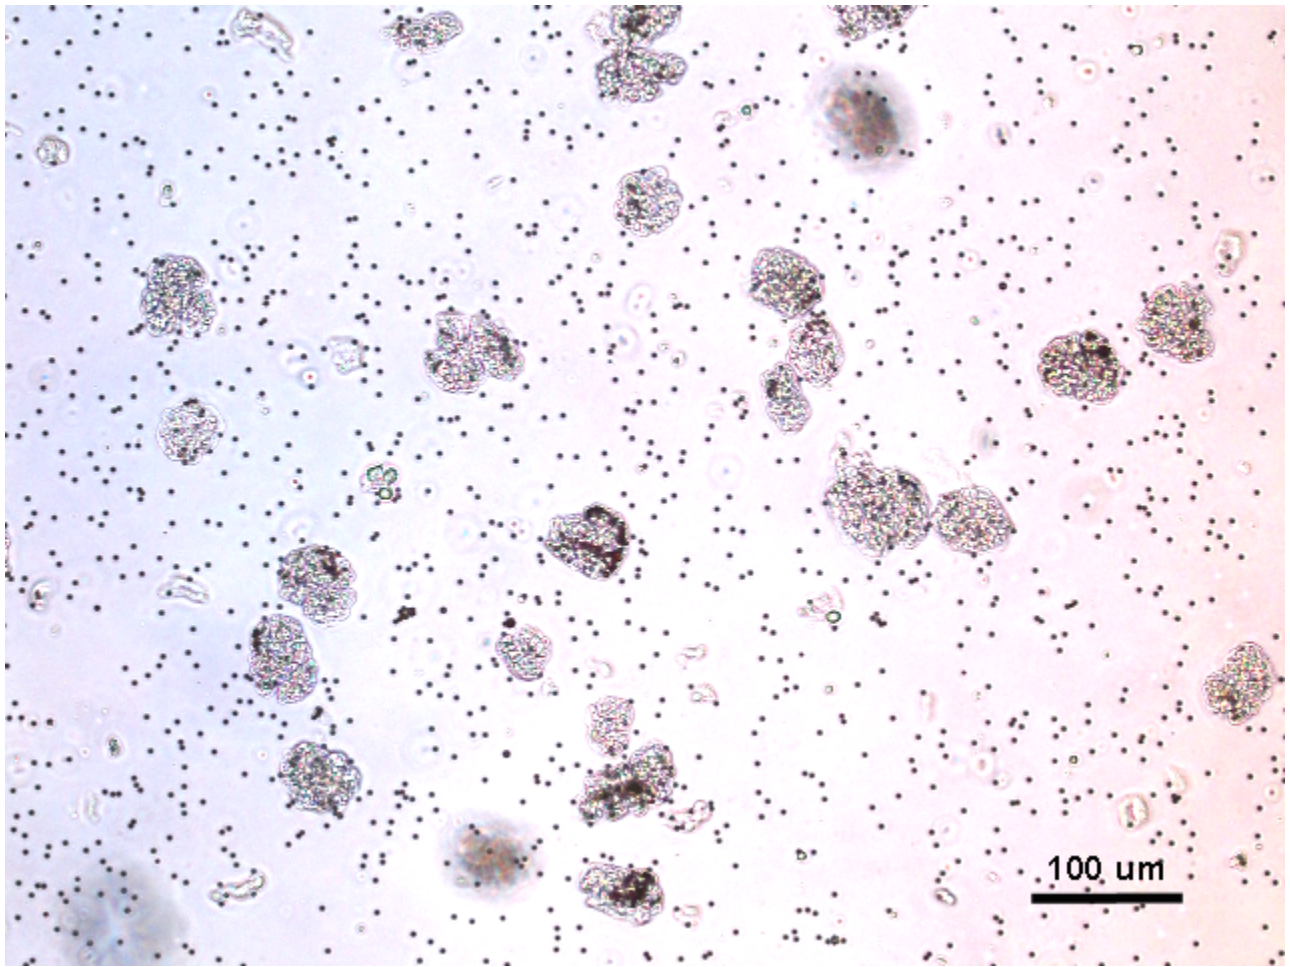

**Figure S1.** Mechanical isolation of mouse glomerular tufts. Bright-field stereo-micrograph showing the isolated glomerular tufts from mouse kidneys. Note that the isolated glomeruli are devoid of the parietal cell layer.

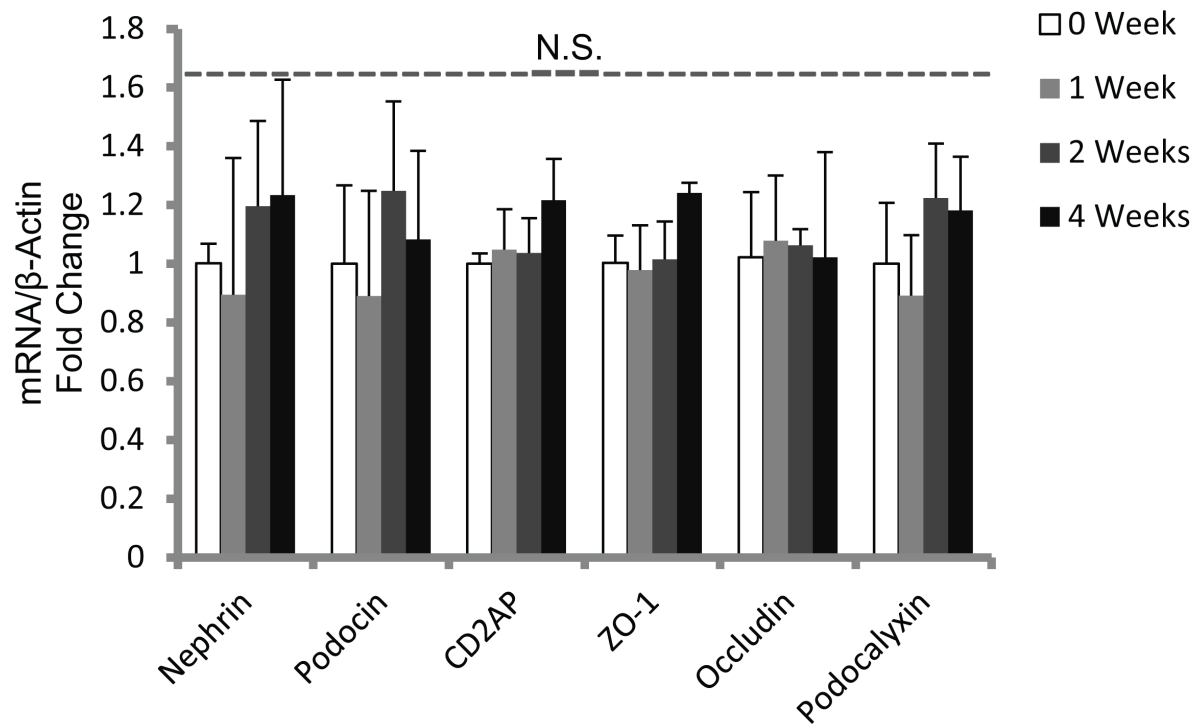

**Figure S2.** The transcript level of podocyte genes in TG animals receiving doxycycline treatments at different time points. The mRNA levels of the indicated genes were measured using real-time PCR in isolated mouse glomeruli and normalized to  $\beta$ -actin mRNA levels. N=3 in all groups.

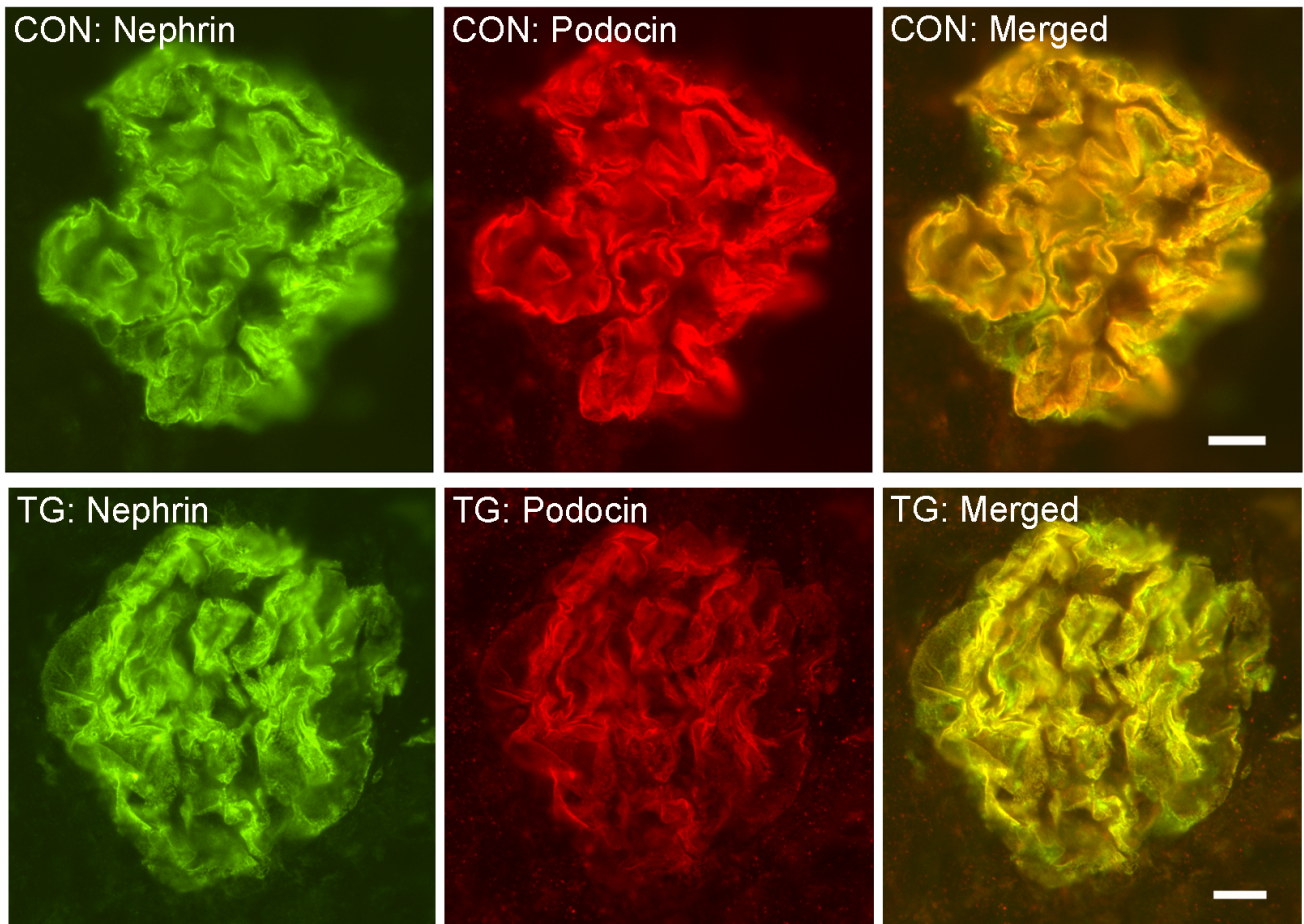

**Figure S3.** Nephrin and podocin localization in claudin-1 induced animals. Immunofluorescent micrographs showing the localization patterns of nephrin and podocin in CON and TG animals. Note that podocin staining signal is markedly reduced in claudin-1 induced animals. Bar: 10  $\mu$ m.

**Table S1.** Material list of molecular and cellular reagents used in this study.

| <b>Primers</b>                                      | <b>Sequence</b>                                |
|-----------------------------------------------------|------------------------------------------------|
| CMV-IE FW                                           | CCATAGAAGACACCGGGACC                           |
| IRES REV2                                           | AAGCGGCTTCGGCCAGTAAC                           |
| Nphs1                                               | GAAGCAGCAGAATGAGTTCACACTGGGTCC                 |
| rtTA                                                | ACTTTGCTCTTGTCCAGTCTAGACATGGTG                 |
| CLDN1-F (mouse)                                     | GCCATCTACGAGGGACTGTG                           |
| CLDN1-R (mouse)                                     | AAAGATTGCGATCAGCCCCA                           |
| CLDN1-F (rat)                                       | CTGCTCAGGCCATCTACGAG                           |
| CLDN1-R (rat)                                       | AAAGATTGCGATCAGCCCCA                           |
| Nephrin-F                                           | TAATGTGTCTGCAGCCCAGG                           |
| Nephrin-R                                           | TCCACTCCAGTCCTACCGAG                           |
| Podocin-F                                           | TTGGCACATCGATCCCTCAC                           |
| Podocin-R                                           | CTTTGGCCTGTCTTTGTGCC                           |
| Occludin-F                                          | GGCAAGCGATCATACCAGA                            |
| Occludin-R                                          | TTCCTGCTTTCCCCTTCGTG                           |
| ZO-1-F                                              | ATTCTCAGAGCCAGCCCAAC                           |
| ZO-1-R                                              | AAGAGCTGGACAGAGGTGGA                           |
| CD2AP-F                                             | TGGAAGGGTGAACCTGAACGG                          |
| CD2AP-R                                             | TTGCAGGAGGAGGTGGTTTC                           |
| Podocalyxin-F                                       | GTCTGCATGGCATCCTTCT                            |
| Podocalyxin-R                                       | GTCTGCAGCTCCTCTGTGAG                           |
| $\beta$ -actin-F (mouse)                            | CGTTGACATCCGTAAAGAC                            |
| $\beta$ -actin-R (mouse)                            | TGGAAGGTGGACAGTGAG                             |
| $\beta$ -actin-F (rat)                              | CCACCATGTACCCAGGCATT                           |
| $\beta$ -actin-R (rat)                              | CGGACTCATCGTACTCCTGC                           |
| <b>Reagent</b>                                      | <b>Suppliers</b>                               |
| TRIzol® Reagent                                     | Invitrogen 15596-018                           |
| iQ™ SYBR® Green Supermix                            | Bio Rad 170-8882                               |
| Lipofectamine® 2000 Transfection Reagent            | Invitrogen 11668019                            |
| DC Protein Assay Kit II                             | Bio Rad 500-0112                               |
| Precision Plus Protein™ WesternC™ Pack              | Bio Rad 161-0385                               |
| FBS Advantage                                       | Atlanta Bio S11050                             |
| Penicillin-Streptomycin                             | Invitrogen 15140-122                           |
| Trypsin EDTA                                        | Cellgro 25-053-CI                              |
| Dulbecco's Modification of Eagle's Medium (DMEM)    | Cellgro 10-013-CV                              |
| Human Albumin ELISA Quantitation Set                | Bethyl Lab E80-129                             |
| Protein A-Agarose                                   | Sigma P2545                                    |
| Protein G Sepharose                                 | Sigma P3296                                    |
| Anti-claudin-1 (rabbit) for Western blot            | Invitrogen™   Thermo Fisher Scientific 51-9000 |
| Anti-claudin-1 (rabbit) for fluorescence microscopy | Abcam ab140349                                 |
| Anti-Nephrin (rabbit)                               | EMD Millipore ABT331                           |
| Anti-Nephrin (goat)                                 | R&D systems AF3159                             |
| Anti-Podocin (rabbit)                               | Abcam ab50339                                  |

Anti-Podocin (rabbit)  
Anti-ZO-1 (rat)  
Anti-occludin (mouse)  
Anti-Podocalyxin (goat)  
Anti-CD2AP (goat)

Sigma P0372  
Lab made  
Invitrogen™ | Thermo Fisher Scientific 33-1500  
R&D systems AF1556  
Santa Cruz Biotechnology
